# Supplementary material for: Mental health related Internet use among psychiatric patients: a cross-sectional analysis
Source: Springer Nature journal article supplement (doi:10.1186/s12888-014-0368-7), 2014-12-01
Supplement: MOESM1 [file 9747670]

**Additional file 1: Sample questions**

**Question 2.12:** Has the Internet helped you with coping with your mental illness?

- Yes, because .....
- Maybe, because.....
- No, because.....

**Question 2.15:** Which mental health related online contents are you interested in?  
(Multiple answers possible)

- Information on mental disorders
- Information on medication (e.g. antidepressants, neuroleptics)
- Search for mental health professionals or services
- Exchange of experience with other patients
- Platforms with mental health professionals
- Other contents: .....
