# Supplementary material for: Mental health related Internet use among psychiatric patients: a cross-sectional analysis
Source: Springer Nature journal article supplement (doi:10.1186/s12888-014-0368-7), 2014-12-01
Supplement: MOESM2 [file 9747670]

## Additional file 2: Analysis of relationship between illness severity (CGI) and Internet use

| CGI                                              | $\chi^2$ | df | p     |
|--------------------------------------------------|----------|----|-------|
| Internet use                                     | 4.6      | 5  | 0.472 |
| Social networks                                  | 3.2      | 5  | 0.665 |
| Forums                                           | 1.0      | 5  | 0.963 |
| Chat                                             | 1.4      | 5  | 0.924 |
| Blogs                                            | 1.4      | 5  | 0.923 |
| Search for MH professionals or services          | 4.6      | 4  | 0.334 |
| Information on mental disorders                  | 4.6      | 4  | 0.330 |
| Information on medication                        | 1.2      | 4  | 0.876 |
| Platforms with other patients                    | 8.0      | 4  | 0.092 |
| Platforms with MH professionals                  | 2.4      | 4  | 0.668 |
| Contact with MH professionals via Internet       | 11.0     | 5  | 0.052 |
| Communication with MH professionals via Internet | 1.1      | 4  | 0.898 |
| Coping online                                    | 4.9      | 5  | 0.428 |
| Internet-based self-management                   | 4.6      | 5  | 0.467 |
